# Supplementary material for: OH-Formation following vibrationally induced reaction dynamics of H2COO
Source: Royal Society of Chemistry journal article supplement (doi:10.1039/d4cp00739e), 2024-01-01
Supplement: d4cp00739e1.pdf [file d4cp00739e1.pdf]

# Supporting Information: OH-Formation Following Vibrationally Induced Reaction Dynamics of $\text{H}_2\text{COO}$

Kaisheng Song,<sup>†,‡</sup> Meenu Upadhyay,<sup>†</sup> and Markus Meuwly<sup>\*,†</sup>

<sup>†</sup>*Department of Chemistry, University of Basel, Klingelbergstrasse 80, CH-4056 Basel,  
Switzerland.*

<sup>‡</sup>*School of Chemistry and Chemical Engineering & Chongqing Key Laboratory of  
Theoretical and Computational Chemistry, Chongqing University, Chongqing 401331,  
China.*

E-mail: m.meuwly@unibas.ch

# 1 Geometrical Criteria for Structure Assignments

Structures in Figures 8 and 9 were assigned as follows. A total of  $\sim 10^7$  structures was analyzed. Each of the 3 states (reactant, TS, product) was approximately identified through specific geometric criteria, starting with the product state, followed by the TS and ending with the reactant state.

For H-transfer, classification started by comparing with criteria for a product structure (HCOOH): [ $1.5 < d(\text{CH}_A) < 2.3 \text{ \AA}$ ,  $d(\text{O}_A\text{O}_B) < 1.7 \text{ \AA}$ , and  $d(\text{H}_A\text{O}_B) < d(\text{CH}_A)$ ]. If this test failed, criteria for the TS were applied: [ $d(\text{CH}_A) < 1.7 \text{ \AA}$ ,  $d(\text{H}_A\text{O}_B) < 1.5 \text{ \AA}$ ,  $d(\text{O}_A\text{O}_B) < 1.7 \text{ \AA}$ ),  $(d(\text{CH}_A) - d(\text{O}_A\text{O}_B)) < 0.35 \text{ \AA}$ ]. If this test was negative, criteria for a reactant structure were applied: [ $d(\text{CH}_A) < 2.4 \text{ \AA}$ ,  $d(\text{CO}_A) < 1.8 \text{ \AA}$ ,  $d(\text{H}_A\text{O}_B) < 1.3 \text{ \AA}$ ,  $d(\text{O}_A\text{O}_B) < 1.7 \text{ \AA}$ ].

For the dioxirane pathway, classification started by comparing with dioxirane: [ $60^\circ < \text{CO}_A\text{O}_B \leq 85^\circ$ ,  $d(\text{CO}_A) > 1.3 \text{ \AA}$ , and  $d(\text{O}_A\text{O}_B) > 1.45 \text{ \AA}$ ]; for the TS the criterion was: [ $80^\circ < \text{CO}_A\text{O}_B < 100^\circ$ ]; and for the reactant: [ $d(\text{CH}_A) < 2.4 \text{ \AA}$  and  $d(\text{CO}_A) < 1.9 \text{ \AA}$ ]. In both cases (H-transfer and dioxirane formation) a structure remained unclassified if it failed all tests. Of course, other and more refined criteria could be applied or the distributions could be smoothed. However, for the present purpose the approach outlined above was deemed sufficient.

## 2 Additional Figures

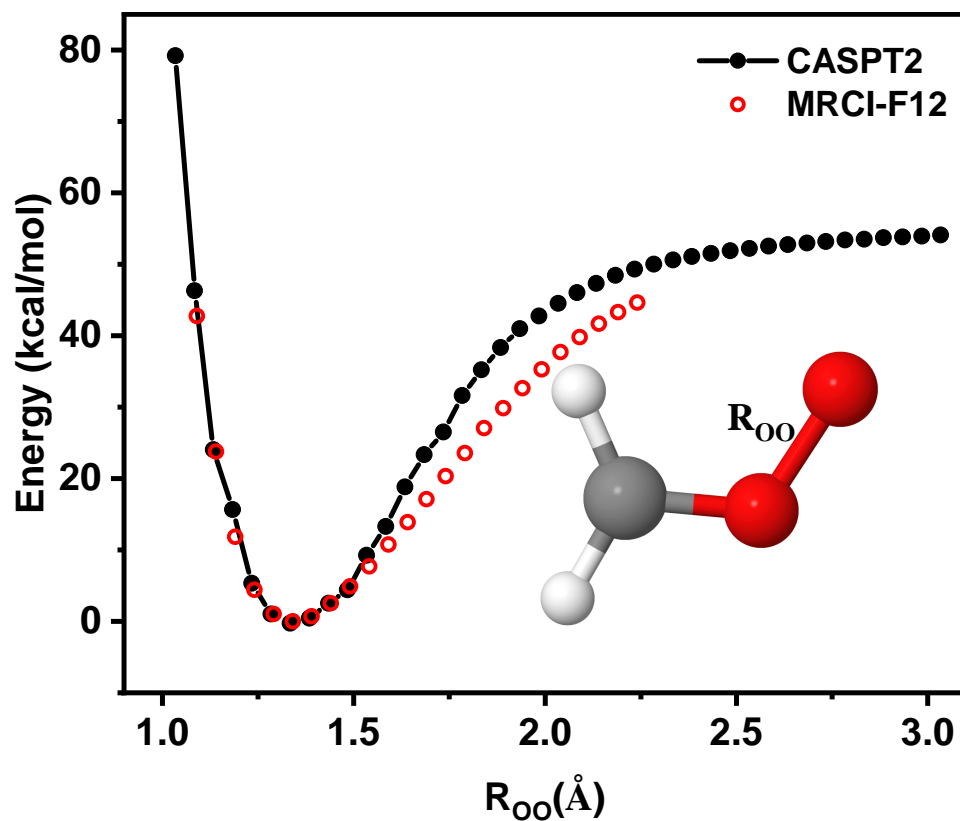

Figure S1: One-dimensional cut at CASPT2 level of theory for the reactant along the O-O bond with other coordinates fixed at the equilibrium of  $\text{H}_2\text{COO}$ . The relaxed scan along the O-O bond (red open circle) at the MRCI-F12 level from Ref.<sup>1</sup> is included for comparison.

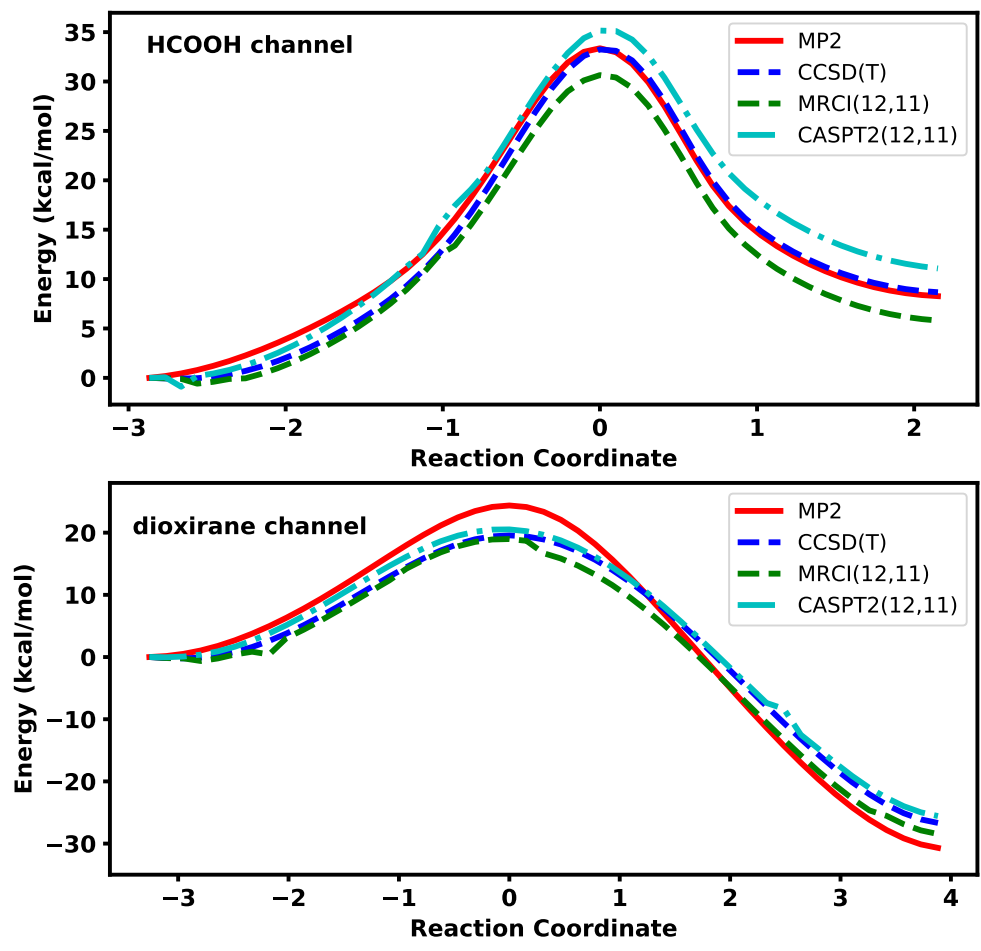

Figure S2: The energy profiles of  $\text{H}_2\text{COO}$  for the H-transfer channel (upper panel) and for the dioxirane channel (bottom panel). The performance of four different levels of theory (MP2, CCSD(T), MRCI, CASPT2) are included for comparison.

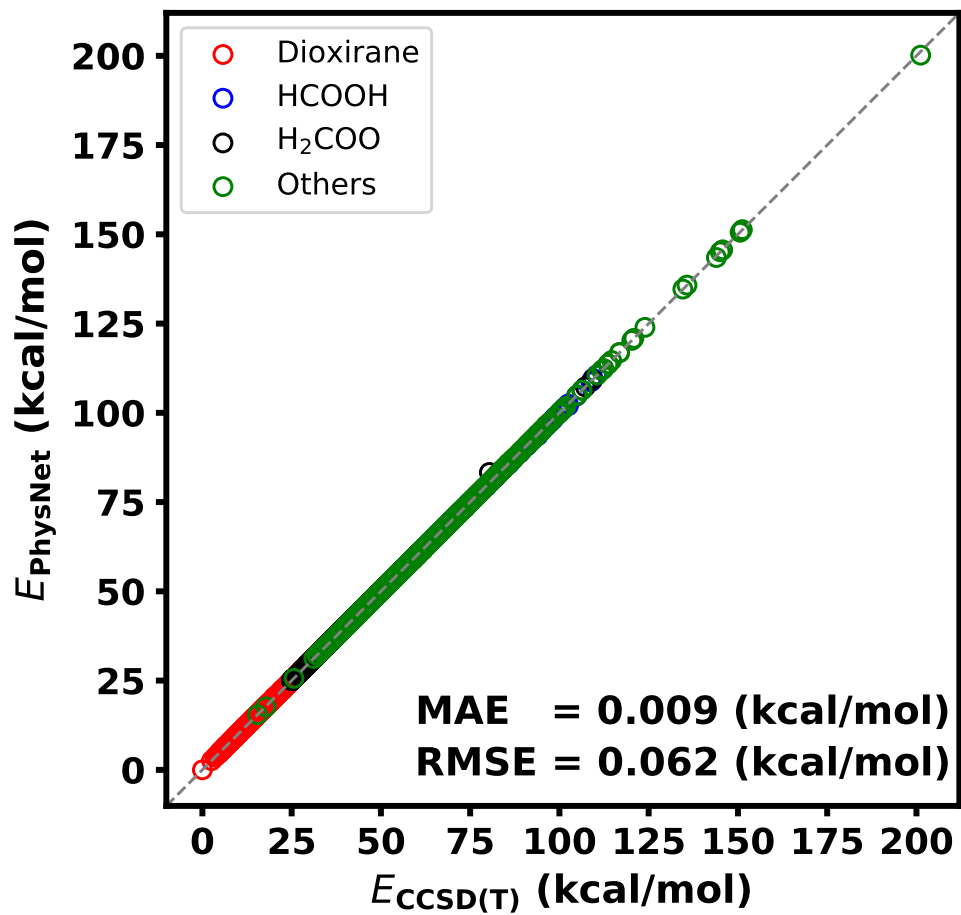

Figure S3: Correlation of 2962 (10%) *ab initio* energies and predicted energies on the test set from the PhysNet base model.

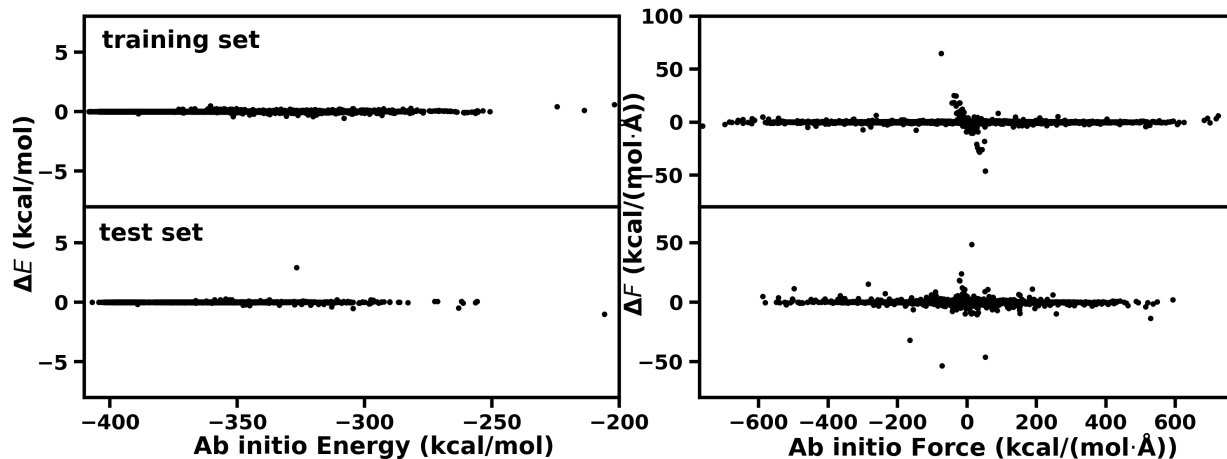

Figure S4: Comparison between reference CCSD(T)-F12a/aVTZ energies/forces and predicted energies/forces on the training and test sets from the PhysNet base model, from top to bottom. The performance of the best PhysNet base model for  $\text{H}_2\text{OOC}$  is shown. Here,  $\Delta E = E_{\text{PhysNet}} - E_{\text{CCSD}}$ ,  $\Delta F = F_{\text{PhysNet}}^\alpha - F_{\text{CCSD}}^\alpha$  where  $\alpha = (x, y, z)$  are the three Cartesian components of the forces on each atom. On the energies for the base model, the  $\text{MAE}_{\text{train}}(E)$  and  $\text{MAE}_{\text{test}}(E)$  are 0.007, 0.009 kcal/mol, and the corresponding  $\text{RMSE}_{\text{train}}(E)$  and  $\text{RMSE}_{\text{test}}(E)$  are 0.019, 0.062 kcal/mol. The  $\text{MAE}_{\text{train}}(F)$  and  $\text{MAE}_{\text{test}}(F)$  on forces for the model are 0.022, 0.063 kcal/(mol·Å), and the corresponding  $\text{RMSE}_{\text{train}}(F)$  and  $\text{RMSE}_{\text{test}}(F)$  are 0.251, 0.597 kcal/(mol·Å).

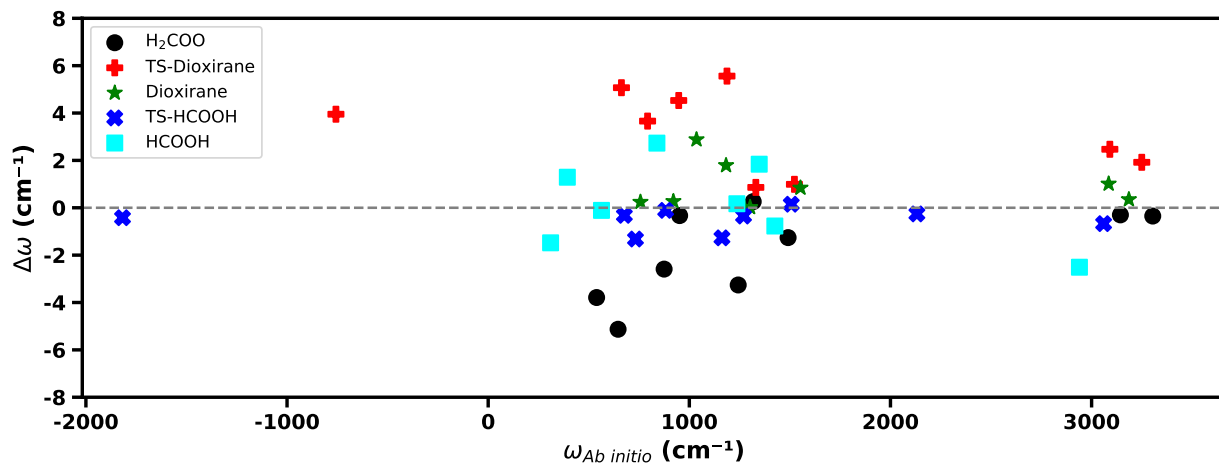

Figure S5: Accuracy of the harmonic frequencies from the PhysNet base model is shown, with respect to the appropriate reference *ab initio* values. Here,  $\Delta\omega = \omega_{\text{Ab initio}} - \omega_{\text{PhysNet}}$ . All absolute deviations of the harmonic frequencies are smaller than 6  $\text{cm}^{-1}$ . The harmonic frequencies and their intensities (km/mol) at the MP2/6-311++G(2d,2p) level of theory for  $\text{H}_2\text{COO}$  are 535.5(19.4), 640.8(20.6), 872.2(41.5), 951.5(856.5), 1239.9(209.8), 1318.1(9.6), 1490.0(5.2), 3142.3(15.9), and 3303.2(2.4)  $\text{cm}^{-1}$ . The measured experimental (anharmonic) frequencies for  $\text{H}_2\text{COO}$  are 847.44, 909.26, 1213.30, 1285.90 and 1434.10  $\text{cm}^{-1}$ .<sup>2,3</sup>

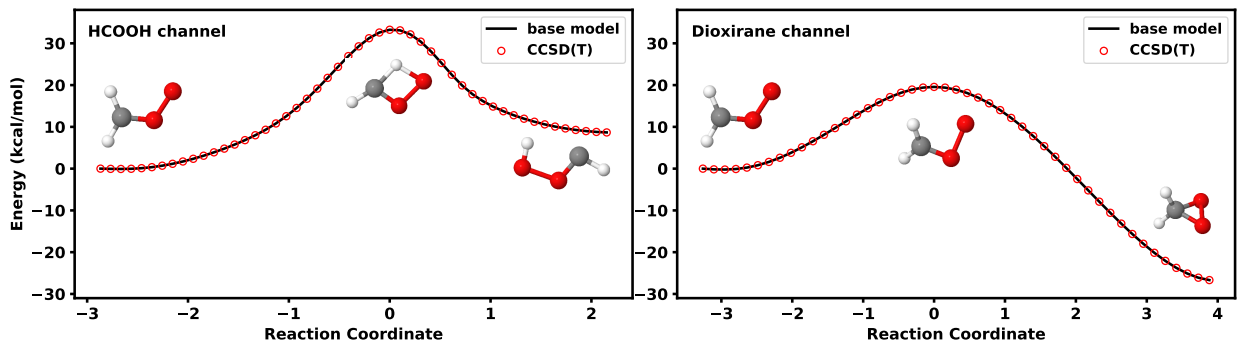

Figure S6: Energy profiles of the H-transfer channel (left panel) and the dioxirane formation channel (right panel). Here, the black solid line represents the energies from the PhysNet base model, and the red open circles refer to the reference CCSD(T)-F12a/aVTZ energies.

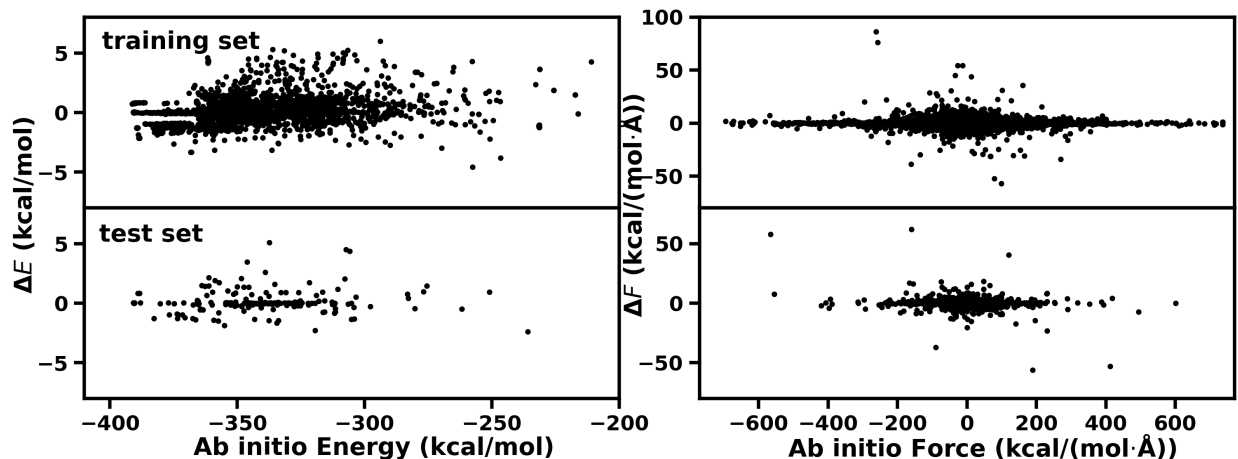

Figure S7: Comparison between reference CASPT2/aVTZ energies/forces and predicted energies/forces on the training and test sets from the PhysNet TL model, from top to bottom. The performance of the best PhysNet TL model for  $\text{H}_2\text{OOC}$  is shown. Here,  $\Delta E = E_{\text{PhysNet}} - E_{\text{CCSD}}$ ,  $\Delta F = F_{\text{PhysNet}}^\alpha - F_{\text{CCSD}}^\alpha$  where  $\alpha = (x, y, z)$  are the three Cartesian components of the forces on each atom. On the energies for the TL model, the  $\text{MAE}_{\text{train}}(E)$  and  $\text{MAE}_{\text{test}}(E)$  are 0.43, 0.41 kcal/mol, and the corresponding  $\text{RMSE}_{\text{train}}(E)$  and  $\text{RMSE}_{\text{test}}(E)$  are 0.91, 0.85 kcal/mol. The  $\text{MAE}_{\text{train}}(F)$  and  $\text{MAE}_{\text{test}}(F)$  on forces for the model are 0.39, 0.75 kcal/(mol·Å), and the corresponding  $\text{RMSE}_{\text{train}}(F)$  and  $\text{RMSE}_{\text{test}}(F)$  are 1.46, 3.54 kcal/(mol·Å).

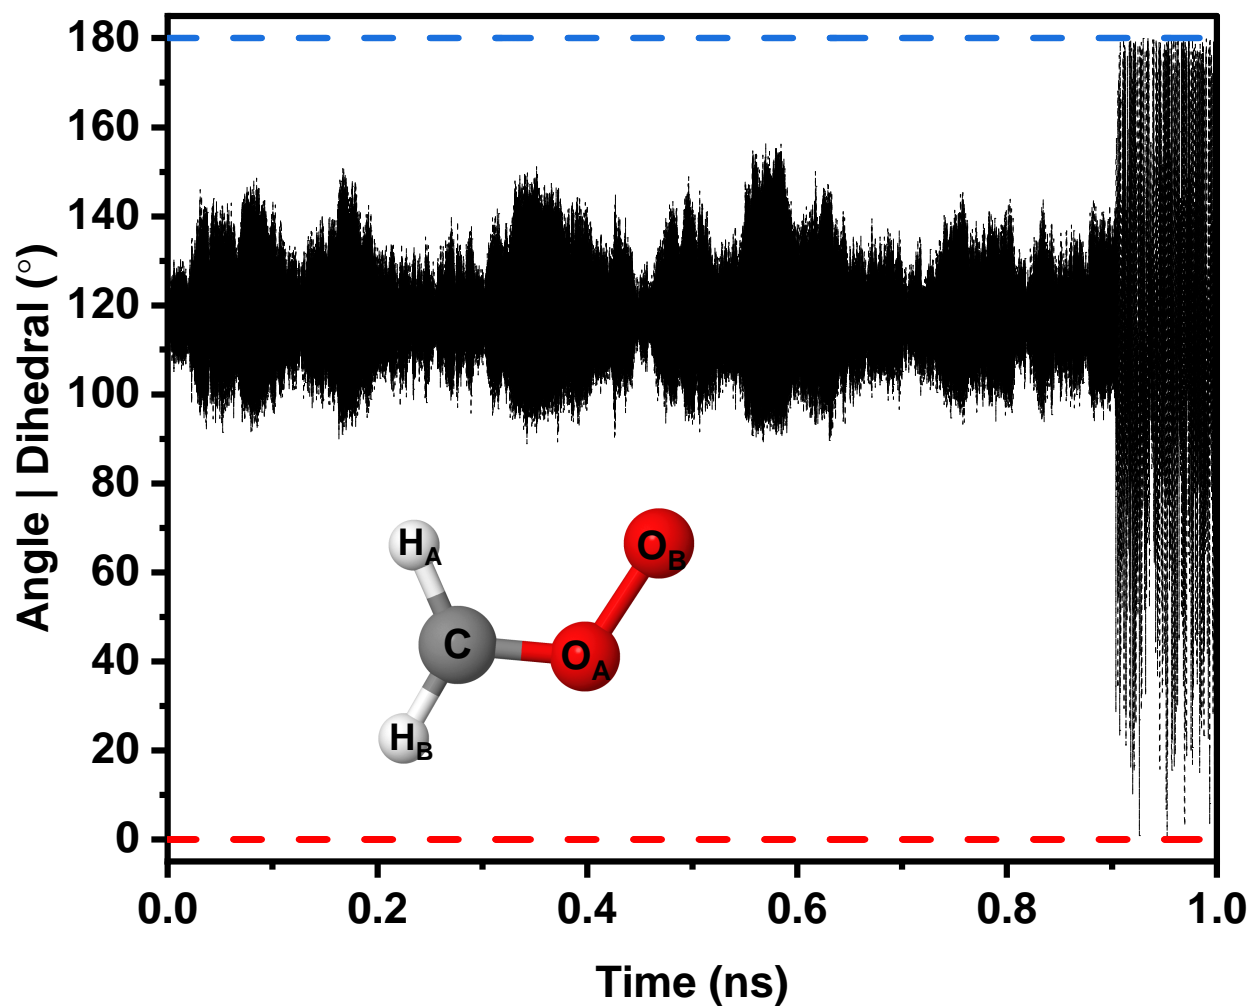

Figure S8: Time series for  $\text{CO}_A\text{O}_B$  valence angle (black) and  $\text{H}_A\text{CO}_A\text{O}_B$  (red) and  $\text{H}_B\text{CO}_A\text{O}_B$  dihedrals (blue) for a reactive trajectory for the H-transfer channel by exciting  $\sim 4\nu_{\text{CH}}$  (32.0 kcal/mol) using the PhysNet TL PES. H-transfer occurs after  $\sim 0.9$  ns. The molecule remains planar throughout the simulation.



### 3 Additional Tables

Table S1: The harmonic bond, Morse bond, valence angle and generalized van der Waals parameters for reactant(CH<sub>2</sub>OO) and product(dioxirane).  $k_b$  in kcal/mol/Å<sup>2</sup>,  $r_e$  in Å,  $D_e$  in kcal/mol,  $\beta$  in Å<sup>-1</sup>,  $k_\theta$  in kcal/mol/radian<sup>2</sup>,  $\theta_e$  in degree,  $k_d$  in kcal/mol,  $\phi_d$  in degree,  $k_i$  in kcal/mol/radian<sup>2</sup>,  $\phi_i$  in degree,  $r$  in Å and  $\epsilon$  in kcal/mol. Atom number code (see Figure S8): C(1), H<sub>A</sub>(2), H<sub>B</sub>(3), O<sub>A</sub>(4), O<sub>B</sub>(5).

| Reactant      |            |            |          |       | Product    |            |          |   |
|---------------|------------|------------|----------|-------|------------|------------|----------|---|
| Bond harmonic | $k_b$      | $r_e$      |          |       | $k_b$      | $r_e$      |          |   |
| 1 - 2         | 410.12     | 1.08       |          |       | 473.13     | 1.09       |          |   |
| 1 - 3         | 410.12     | 1.08       |          |       | 473.13     | 1.09       |          |   |
| 1 - 4         | 474.32     | 1.27       |          |       | 437.81     | 1.38       |          |   |
| 4 - 5         | 203.53     | 1.34       |          |       | 242.86     | 1.52       |          |   |
| Bond Morse    | $D_e$      | $r_e$      | $\beta$  |       | $D$        | $r_e$      | $\beta$  |   |
| 1 - 5         | X          | X          | X        |       | 127.75     | 1.38       | 2.69     |   |
| Angle         | $k_\theta$ | $\theta_e$ |          |       | $k_\theta$ | $\theta_e$ |          |   |
| 2 - 1 - 3     | 26.39      | 121.99     |          |       | 20.13      | 135.59     |          |   |
| 2 - 1 - 4     | 46.27      | 116.96     |          |       | 54.50      | 118.82     |          |   |
| 3 - 1 - 4     | 53.38      | 113.91     |          |       | 67.83      | 117.68     |          |   |
| 1 - 4 - 5     | 39.38      | 121.72     |          |       | 67.78      | 120.94     |          |   |
| 4 - 1 - 5     | X          | X          |          |       | 22.97      | 89.04      |          |   |
| 2 - 1 - 5     | X          | X          |          |       | 82.66      | 106.65     |          |   |
| 3 - 1 - 5     | X          | X          |          |       | 54.73      | 118.00     |          |   |
| 1 - 5 - 4     | X          | X          |          |       | 40.18      | 98.21      |          |   |
| Dihedral      | N          | $k_d$      | $\phi_d$ |       | N          | $k_d$      | $\phi_d$ |   |
| 2 - 1 - 4 - 5 | 2          | 4.02       | 180.00   |       | X          | X          | X        |   |
| 3 - 1 - 4 - 5 | 2          | 5.54       | 180.00   |       | X          | X          | X        |   |
| Improper      | N          | $k_i$      | $\phi_i$ |       | N          | $k_i$      | $\phi_i$ |   |
| 1 - 2 - 4 - 3 | 0          | 21.33      | 0.00     |       | 0          | 18.04      | 0.00     |   |
| 1 - 5 - 4 - 2 | 0          | X          | X        |       | 0          | 15.26      | 0.00     |   |
| GVDW          | $r$        | $\epsilon$ | n        | m     | $r$        | $\epsilon$ | n        | m |
| 1 - 5         | 1.76       | 0.72       | 6.19     | 12.82 | X          | X          | X        | X |

Table S2: GAPO parameters for dioxirane channel:  $i$  labels the reactant,  $j$  labels the product,  $V_{ij,k}^0$  is the center of the Gaussian function (in kcal/mol),  $\sigma_{ij,k}$  is the width of the Gaussian (in kcal/mol) and  $a_{ij}$  is the polynomial coefficient in kcal/mol.

| $k$ | $V_{ij,k}^0$ | $\sigma_{ij,k}$ | $a_{ij,k0}$ | $a_{ij,k1}$ | $a_{ij,k2}$ | $a_{ij,k3}$ |
|-----|--------------|-----------------|-------------|-------------|-------------|-------------|
| 1   | -5.36605     | 3.91184         | -2.86507    | -0.43938    | -0.20009    | 0.00187     |
| 2   | 13.43213     | 1.78751         | -0.21920    | 0.27335     |             |             |
| 3   | 5.14916      | 3.94423         | -2.00850    |             |             |             |

**Table S3: The harmonic bond, Morse bond, angle and generalized van der Waals parameters for reactant(CH<sub>2</sub>OO) and product(HCOOH).  $k_b$  in kcal/mol/Å<sup>2</sup>,  $r_e$  in Å,  $D$  in kcal/mol,  $\beta$  in Å<sup>-1</sup>,  $k_\theta$  in kcal/mol/radian<sup>2</sup>,  $\theta_e$  in degree,  $k_d$  in kcal/mol,  $\phi_d$  in degree,  $k_i$  in kcal/mol/radian<sup>2</sup>,  $\phi_i$  in degree,  $r$  in Å and  $\epsilon$  in kcal/mol. Atom number code(see Figure S8): C(1), H<sub>A</sub>(2), H<sub>B</sub>(3), O<sub>A</sub>(4), O<sub>B</sub>(5).**

| Reactant      |            |            |          |      | Product    |            |          |       |
|---------------|------------|------------|----------|------|------------|------------|----------|-------|
| Bond harmonic | $k_b$      | $r_e$      |          |      | $k_b$      | $r_e$      |          |       |
| 1 - 3         | 413.90     | 1.09       |          |      | 333.44     | 1.10       |          |       |
| 1 - 4         | 719.68     | 1.28       |          |      | 388.47     | 1.23       |          |       |
| Bond Morse    | $D$        | $r_e$      | $\beta$  |      | $D$        | $r_e$      | $\beta$  |       |
| 1 - 2         | 78.55      | 1.08       | 2.16     |      | X          | X          | X        |       |
| 5 - 2         | X          | X          | X        |      | 67.21      | 0.96       | 1.98     |       |
| 4 - 5         | 349.82     | 1.34       | 1.02     |      | 9.83       | 1.53       | 1.00     |       |
| Angle         | $k_\theta$ | $\theta_e$ |          |      | $k_\theta$ | $\theta_e$ |          |       |
| 2 - 1 - 3     | 18.18      | 106.37     |          |      | X          | X          |          |       |
| 2 - 1 - 4     | 50.22      | 115.51     |          |      | X          | X          |          |       |
| 3 - 1 - 4     | 59.82      | 110.03     |          |      | 31.33      | 101.58     |          |       |
| 1 - 4 - 5     | 99.54      | 120.17     |          |      | 92.80      | 111.12     |          |       |
| 2 - 5 - 4     | X          | X          |          |      | 39.59      | 91.73      |          |       |
| Dihedral      | N          | $k_d$      | $\phi_d$ |      | N          | $k_d$      | $\phi_d$ |       |
| 2 - 1 - 4 - 5 | 2          | 5.97       | 180.00   |      | X          | X          | X        |       |
| 3 - 1 - 4 - 5 | 2          | 7.37       | 180.00   |      | X          | X          | X        |       |
| 3 - 1 - 4 - 5 | 3          | X          | X        |      | 3          | 20.52      | 0.00     |       |
| 1 - 4 - 5 - 2 | 2          | X          | X        |      | 2          | 7.43       | 180.00   |       |
| Improper      | N          | $k_i$      | $\phi_i$ |      | N          | $k_i$      | $\phi_i$ |       |
| 1 - 2 - 4 - 3 | 0          | 35.41      | 0.00     |      | X          | X          | X        |       |
| GVDW          | $r$        | $\epsilon$ | n        | m    | $r$        | $\epsilon$ | n        | m     |
| 5 - 2         | 3.32       | 1.3        | 6.90     | 13.8 | X          | X          | X        | X     |
| 1 - 2         | X          | X          | X        | X    | 4.61       | 1.35       | 6.95     | 12.86 |

**Table S4: GAPO parameters for H-transfer channel:  $i$  labels the reactant,  $j$  labels the product,  $V_{ij,k}^0$  is the center of the Gaussian function (in kcal/mol),  $\sigma_{ij,k}$  is the width of the Gaussian (in kcal/mol) and  $a_{ij}$  is the polynomial coefficient in kcal/mol.**

| $k$ | $V_{ij,k}^0$ | $\sigma_{ij,k}$ | $a_{ij,k0}$ | $a_{ij,k1}$ |
|-----|--------------|-----------------|-------------|-------------|
| 1   | -9.51488     | 28.24630        | -5.64736    | -0.11152    |
| 2   | -0.48168     | 6.31526         | -5.29915    |             |
| 3   | 34.98611     | 15.02948        | 2.19718     |             |

**Table S5: Comparison of energies for 5 stationary points between the predicted energies and *ab initio* energies (in kcal/mol) from the PhysNet base model.**

|            | H <sub>2</sub> COO | TS-dioxirane | Dioxirane | TS-HCOOH | HCOOH |
|------------|--------------------|--------------|-----------|----------|-------|
| CCSD(T)    | 0.00               | 20.03        | -26.15    | 33.86    | 9.15  |
| base model | 0.00               | 20.03        | -26.15    | 33.86    | 9.15  |

## References

- (1) Dawes, R.; Jiang, B.; Guo, H. UV absorption spectrum and photodissociation channels of the simplest Criegee intermediate (CH<sub>2</sub>OO). *J. Am. Chem. Soc.* **2015**, *137*, 50–53.
- (2) Yu, H.-G.; Ndengue, S.; Li, J.; Dawes, R.; Guo, H. Vibrational energy levels of the simplest Criegee intermediate (CH<sub>2</sub>OO) from full-dimensional Lanczos, MCTDH, and MULTIMODE calculations. *J. Chem. Phys.* **2015**, *143*, 084311.
- (3) Huang, Y.-H.; Li, J.; Guo, H.; Lee, Y.-P. Infrared spectrum of the simplest Criegee intermediate CH<sub>2</sub>OO at resolution 0.25 *cm*<sup>-1</sup> and new assignments of bands 2ν<sub>9</sub> and ν<sub>5</sub>. *J. Chem. Phys.* **2015**, *142*, 214301.
